# Supplementary material
Source: PubMed Central journal article supplement (PMC6107881)
Supplement: blood821066-suppl1.pdf [file blood821066-suppl1.pdf]

## **Supplemental Methods**

### **Mice**

Homozygous JAK2V617F (JAK HOM) knock-in mice<sup>1</sup> were crossed with *Tet2* KO (TET HOM) mice from Ko et al., 2011<sup>2</sup>. HSCs from single (JAK HOM or TET HOM) and double mutant (JAK HOM TET HOM) animals between 2 and 4 months of age were compared to wild-type littermate (for JAK HOM) or age-matched (for TET HOM and double mutant) controls. c-Kit mutant C57Bl6<sup>W41/W41-Ly5.1</sup> (W41) or C57Bl6 mice were used as recipients for transplantation experiments. All mice were bred and maintained at the University of Cambridge in microisolator cages and provided continuously with sterile food, water, and bedding. All mice were kept in specified pathogen-free conditions, and all procedures performed according to the United Kingdom Home Office regulations.

### **Isolation of E-SLAM HSCs**

Suspensions of BM cells were isolated from the femora, tibiae, and ilia of mice. Red blood cell lysis was performed by treatment with ammonium chloride (STEMCELL Technologies, Vancouver, Canada (STEMCELL)). E-SLAM cells were isolated as described previously<sup>3</sup> using CD45 FITC (Clone 30-F1,1 BD Biosciences, San Jose, CA, USA (BD)), EPCR PE (Clone RMEPCR1560, STEMCELL), CD150 Pacific Blue (PB) or PE-Cy7 (Clone TC15-12F12.2, both from Biolegend, San Diego, USA (Biolegend)), CD48 APC (Clone HM48-1, Biolegend), and 7-Aminoactinomycin D (7AAD) (Life Technologies, Carlsbad, CA, USA (Life Technologies)). The cells were sorted on an Influx (BD) using the following filter sets 530/40 (for FITC), 585/29 (for PE), 670/30 (for APC), 460/50 (for Pacific Blue) and 670/30 (for 7AAD). When single E-SLAM HSCs were required, the single-cell deposition unit of the sorter was used to place 1 cell into the wells of round bottom 96-well plates, each well having been preloaded with 50uL medium (described below).

### ***In vitro* cultures and clone size calculations**

E-SLAM HSCs were sorted and cultured in StemSpan media (STEMCELL) containing fetal calf serum (FCS, STEMCELL or Sigma-Aldrich, St. Louis, MO, USA), 300ng/mL SCF (STEMCELL or Bio-techne, Abingdon, UK (Bio-techne)) and 20ng/mL IL-11 (STEMCELL or Bio-techne). Daily cell counts were performed and cell cycle kinetics determined for the first and second division by scoring wells manually as having 1, 2, or 3-4 cells. At 10 days, clones were estimated to be very small (less than 50 cells), small (50–500 cells), medium (500–10,000 cells), or large (10,000 or more cells), clone size estimates were validated as described previously using fluorescent

counting beads<sup>4</sup>. Ten-day clones were stained with Sca-1 PB (Clone E13-161.7, Biolegend), Mac1 BV605 (Clone M1/70, Biolegend), Gr1 PE-Cy7 (Clone RB6-8C5, Biolegend), c-Kit APC-Cy7 (Clone 2B8, Biolegend), CD45.2 FITC (Clone 104, Biolegend), and 7AAD (Life Technologies). To enumerate cells, a defined number of fluorescent beads (Trucount Control Beads, BD) were added to each well and each sample was back-calculated to the proportion of the total that were run through the cytometer. Small clones were not assessed individually by flow cytometry due to low numbers of cells. Flow cytometry was performed on an LSRFortessa (BD) and all data were analyzed using FlowJo (Treestar, Ashland, OR, USA).

### **Cobblestone-area-forming cell assay**

The CAFC assay was modified from de Haan et al.<sup>5</sup> and performed as described previously<sup>6</sup>. The FBMD stromal cell line (obtained from G. de Haan, originally from R. Ploemacher, Erasmus University, Rotterdam, Netherlands) was maintained in Quantum 333 complete fibroblast medium with L-glutamine (PAA Laboratories) plus  $\beta$ -mercaptoethanol, penicillin, and streptomycin. Stromal cell layers were established in the inner 60 wells of 96-well plates to avoid potential evaporation related effects and were incubated at 33°C. Prior to sorting, medium was replaced with 200  $\mu$ L Iscove's modified Dulbecco's medium, 20% horse serum (STEMCELL),  $10^{-5}$  mol/L hydrocortisone (STEMCELL),  $10^{-4}$  mol/L  $\beta$ -mercaptoethanol plus penicillin and streptomycin (collectively, CAFC medium). Each well was seeded with a single HSC, cultured at 37°C, and wells were examined each week for 12 weeks for the presence or absence of cobblestone areas (identified as colonies of at least five flat non-refractile cells growing underneath the stromal layer). Medium was changed each week by removing most of the old medium using a multichannel pipette (without disturbing the stromal layer) and adding 180  $\mu$ L of fresh CAFC medium.

### **Gene-expression profiling**

Single-cell gene expression analysis was performed as described previously<sup>7</sup>. Single-cell expression data were collected using the Fluidigm Data Collection software.  $\Delta$ Ct values were calculated as previously described<sup>7</sup> by cell-wise normalization to the mean expression level of two housekeeping genes (Ubc and Polr2a). All housekeepers, *Cdkn2a*, *Eif2b1*, *Mitf*, *Cbx7*, *Meis1*, *Tet2*, and *Egfl7* were removed from the dataset for downstream analysis. *Cdkn2a* was not expressed in any of the cell types, *Egfl7*, *Mitf*, *Cbx7*, and *Eif2b1* did not pass quality control in any genotype, *Meis1* was excluded in the TET2 single and double-mutant genotypes

due to aberrant signal in no template controls, and *Tet2* was excluded since the TET2 knock-out cells had no expression and clustering would have been biased. Hierarchical clustering was performed in R (<http://www.r-project.org>) using the *hclust* package and *heatmap.2* from the *gplots* package using Spearman rank correlations and ward linkage. t-SNE was performed in R (<http://www.r-project.org>) using the *Rtsne* package. PCA was performed using the *prcomp* function.

### **Bone Marrow Transplantation Assays**

Donor cells ( $5 \times 10^5$  for whole BM competitive transplantations and doses as indicated in legend for limiting dilution transplantations) were obtained from C57BL/6J mice (CD45.2). Frequencies of phenotypic HSCs (per 1000 lin<sup>-</sup> BM cells) were as follows: WT (3-12), JAK HOM (1-3), TET HOM (3-10), and double-mutant (0.5-5). All competitor cells were obtained from WT C57BL/6J (CD45.1/CD45.2) mice and  $2-5 \times 10^5$  whole BM cells were transplanted alongside the donor cell fractions. For competitive transplantation assays, recipients were adult C57BL6<sup>W41/W41</sup> (W41) mice as described previously<sup>8,9</sup>. Mice were irradiated with a single dose (400 cGy) by Caesium irradiation and all transplants were performed by intravenous tail vein injection using a 29.5G insulin syringe. On average, host cell recovery accounted for 30% of the total cells (17-60%) but since a known number of genotypically distinct competitor cells were transplanted, host numbers were not required for calculations of relative chimerism between donor and competitor cells (donor/(donor+competitor)). For secondary transplants, whole BM was obtained from primary recipients and  $1 \times 10^7$  cells containing a mixture of recipient, competitor, and donor-derived cells were transplanted.

### **Peripheral Blood Analysis**

For all transplantation assays, peripheral blood samples were collected from the tail vein of mice at 4, 8, 16, 20, and 24 weeks following transplantation and analyzed for repopulation levels as described previously<sup>7,8</sup>. Antibodies used were Ly6g PB or BV421 (Clone 1A8, Biolegend), Mac1 FITC or BV605 (Clone M1/70, both Biolegend), CD3e PE (Clone 17A2, Biolegend), B220 APC (Clone RS3-6B2, Biolegend), CD45.1 AlexaFluor700 (Clone A20, Biolegend), CD45.2 APC-Cy7 or FITC (Clone 104, both Biolegend), and 7-AAD (Life Technologies). Peripheral blood cell counts were performed using a Woodley ABC blood counter (Woodley Equipment, Bolton, UK).

### **Overexpression Assays**

Small pools (1500-3600 cells) of CD45<sup>+</sup>Lin<sup>-</sup>CD150<sup>+</sup>CD48<sup>-</sup> hematopoietic stem and progenitor cells (HSPCs) were isolated and split between wells of a 96 well plate coated with RetroNectin (Clontech, Mountain View, CA, USA). Following their isolation, cells were kept in 50ul of medium as described above and were supplemented with polybrene (Sigma-Aldrich) and a lentivirus equipped with the gene of interest in a pCCL-c-MNDUS-X2-PGK-EGFP backbone. Plates were centrifuged at 600xg for 30 minutes, 30°C, to promote infection, before being transferred to a 37°C incubator. The following day, a further 150µL of HSC medium was added to dilute polybrene and the virus and three days after infection, cells were resorted for GFP expression and viability (e.g., 7AAD-negative). GFP<sup>+</sup> cells (300-2000) were transplanted into sublethally irradiated CD45.1 W41 or lethally irradiated CD45.1 C57Bl6/J recipient mice and monitored for donor chimerism and disease phenotype as described above.

### **Isolation of patient stem and progenitor cells**

Fresh venous blood samples (40-60ml collected in Lithium-Heparin tubes) were collected from MPN patients (n=12, 3 ET, 5 PV, 4 secondary MF) with JAK2 and TET2 mutations diagnosed according to British Committee for Standards in Haematology (BCSH) guidelines. The study was approved by the Cambridge and Eastern Region Ethics Committee, and was carried out in accordance with the principles of the Declaration of Helsinki. Informed written consent was obtained from all patients before participating. Mononuclear cells (MNCs) were isolated using Lymphoprep (Axis Shield PLC, Dundee, UK) according to the manufacturer's instructions. MNCs were washed with and stored at 4°C overnight in PBS supplemented with 10% FCS and 5mM EDTA. In the morning, cells were spun at 300xg for 7 minutes and the resulting pellets were treated with 50µL of 1 mg/mL DNaseI (STEMCELL) to avoid clumping. Cells were then depleted of differentiated hematopoietic cells using the EasySep human hematopoietic progenitor enrichment kit (#19056 STEMCELL Technologies) with the following modifications: All samples were processed in 500µL of recommended medium and the progenitor enrichment cocktail was used at 5µL/mL cells, and the sample was only taken through one round of separation<sup>10,11</sup>. Cells were then stained with antibodies to isolate the various progenitor compartments: anti-CD34 Per-CpCy5.5 or PE-Cy7 (clone 581 Biolegend), anti-CD38 FITC (clone HIT2, BD Biosciences), anti-CD90 APC (clone 5E10, BD Biosciences) and anti-CD45RA Horizon V450 (HI100, BD Biosciences). CD34<sup>+</sup>CD38<sup>-</sup> cells were sorted into microcentrifuge tubes containing 500ul of PBS/10%FCS. HSCs were isolated as Lin<sup>-</sup>CD34<sup>+</sup>CD38<sup>-</sup>CD45RA<sup>-</sup>CD90<sup>+</sup> using a BD Influx sorter equipped with 355nm, 405nm, 488nm, 561nm, and 640nm lasers and

sorted directly into individual wells of a 96-well U-bottomed plate. HSCs were sorted as single cells into StemSpan medium (STEMCELL) supplemented with the cc100 cytokine cocktail (STEMCELL), which was used to maintain the stem and progenitor cell fraction in culture before harvesting and placing into a secondary CFC assay using Methocult 04435 (STEMCELL). For proliferation studies, HSC-derived clones were counted on day 10 (<50 cells were counted directly and larger clones were estimated based on diameter and binned into small (50-500) and medium (500+) categories). To improve genotyping accuracy, 7-10 day single HSC-derived cultures were placed into a CFC assay and the resultant colonies were genotyped for TET2 and JAK2 mutation status.

### **Primary patient sample gene expression assays**

RNA was extracted from sorted CD34<sup>+</sup>CD38<sup>-</sup> cells (using the PicoPure RNA isolation kit (Applied biosystems, 15295033) as per the manufacturer's instructions. First strand cDNA synthesis was performed using SuperScript III First-Strand Synthesis System (Invitrogen), using Random Hexamers, as per the manufacturer's guidelines. qPCR was carried out using TaqMan probes (Listed in Supplementary table 2) and TaqMan universal mastermix. qPCR assays were run and analysed using the Applied Biosystems ViiA 7 system.

### **Statistical Analyses**

For calculating stem cell frequency and cluster enrichment scores and their corresponding Chi-squared values (two-tailed, Yates correction), we used the web-based calculator at <https://www.graphpad.com/quickcalcs/contingency1/>. For all other p values reported, an unpaired Student's t-test (Microsoft Excel) was used unless otherwise specified.

## **Supplemental Figure Legends**

### **Supplemental Figure 1**

(A) Clone sizes resulting from 14-day single cell cultures of HSCs isolated from WT, JAK2 HET and JAK2 HOM littermate mice. For colonies of less than 50 cells, the total cell number was recorded exactly. Colonies in excess of 50 cells were grouped into three broad categories of small (50-500 cells), medium (500-10,000 cells), and large (>10,000 cells). Estimated clone sizes for medium and large clones were confirmed by individual colony harvest and flow cytometry using fluorescent cell counting beads as previously described<sup>4</sup>.

### **Supplemental Figure 2**

Panel A is the loadings plot for the PCA shown in Figure 1. Panel B shows hierarchical clustering of single cell gene expression profiling of HSCs from WT and JAK2 HOM littermate mice. Two main clusters are separated, the first of which is significantly enriched for JAK HOM mutant cells. Self-renewal regulators absent or lowly expressed in this cluster are displayed in the inset and match the genes that identify the distinct region observed in the Principal Component Analysis in Figure 1.

### **Supplemental Figure 3**

A limiting dilution transplantation experiment was performed to determine the lowest dose of JAK HOM TET HOM whole BM required to give a phenotype. 100,000, 50,000 or 10,000 whole BM cells from WT (left panels) or JAK HOM TET HOM (right panels) mice were transplanted into W41 recipients alongside 100,000 CD45.1/2 competitors. Chimerism (B) and hemoglobin (HGB, C) are shown for three months post-transplantation. Chimerism is not different between WT and mutant cells and a red cell phenotype (indicated by a higher hemoglobin) is only observed in mice transplanted with 100,000 or 50,000 double mutant cells.

### **Supplemental Figure 4**

(A) Primary recipients of TET HOM cells (green line) show no difference in platelet count from WT recipients (blue line). Recipients of JAK HOM (red line) and JAK HOM TET HOM (orange line) cells had reduced platelet count at early time points. (B+C) Assessment of blood parameters at 16 weeks after secondary transplantation revealed only JAK HOM TET HOM (orange) cells are able to sustain high hematocrit (HCT) (B) and hemoglobin (HGB) (C) in secondary transplantation recipients.

### **Supplemental Figure 5**

(A) Five main clusters emerge when single HSCs from mice with each of the four genotypes (WT, JAK HOM, TET HOM, and double mutant) are assessed. Individual HSCs and their expression for each self-renewal regulator with HSCs from each genotype are coloured accordingly: Blue (WT), Red (JAK HOM), Green (TET HOM) and Orange (double mutant). (B) Each cluster was assessed for whether or not it contained an increased or decreased number of HSCs from each genotype compared to that expected by random chance by chi-squared analyses and these results are displayed in the table (yellow indicates  $p < 0.05$  of a higher than expected observation and purple indicates  $p < 0.05$  a lower than expected observation).

### **Supplemental Figure 6**

Gene expression from single HSCs isolated from individual mice are displayed on the PCA plot from Figure 5 ( $n = 10$  mice (5 WT, 3 JAK HOM (RR), 1 TET KO (TKO) and 1 double mutant (RRTKO)).

### **Supplemental Figure 7**

(A) t-Distributed Stochastic Neighbor Embedding (t-SNE) analysis for the same dataset that appears in the PCA in Figure 5. Similar clustering is observed with WT cells scattered across the entire landscape, an area at the top of the plot enriched for JAK2 HOM (RR) cells (and lacking TET KO and double mutant (RRTKO) cells), an area to the left enriched for TET KO cells and double mutant cells clustering either with the TET KO cells or to the right side of the plot. (B) Violin plots for each of the four genes taken forward for functional assays with individual genotypes indicated.

### **Supplemental Figure 8**

Gene expression of *Bmi1* (A), *Runx1* (B), *Pbx1* (C) and *Meis1* (D) from bulk CD34<sup>+</sup>CD38<sup>-</sup> patient samples from patients with either no mutations, a JAK V617F mutation or both JAK and TET mutations. Probe IDs are located in Supplemental Table 2.

### **Supplemental Table 1**

List of genes and corresponding Taqman Assay ID for genes used in multiplexed qPCR assays. Assay efficiencies were determined by a dilution series using cDNA prepared from WT BM lineage marker negative cells (5-fold dilutions) and

efficiencies were calculated as described in Pfaffl et al.<sup>12</sup>, with a value of 2 representing perfect efficiency.

## **Supplemental Table 2**

List of genes and corresponding Taqman Assay ID for genes used in human CD34<sup>+</sup>CD38<sup>-</sup> qPCR.

## **Supplemental Appendix**

Excel workbook including all single cell datasets. Zero values represent the average of two internal housekeeping controls run on every chip.

## **References**

1. Li J, Kent DG, Godfrey AL, et al. JAK2V617F homozygosity drives a phenotypic switch in myeloproliferative neoplasms, but is insufficient to sustain disease. *Blood* 2014;123:3139-51.
2. Ko M, Bandukwala HS, An J, et al. Ten-Eleven-Translocation 2 (TET2) negatively regulates homeostasis and differentiation of hematopoietic stem cells in mice. *Proceedings of the National Academy of Sciences of the United States of America* 2011;108:14566-71.
3. Kent DG, Copley MR, Benz C, et al. Prospective isolation and molecular characterization of hematopoietic stem cells with durable self-renewal potential. *Blood* 2009;113:6342-50.
4. Kent DG, Li J, Tanna H, et al. Self-renewal of single mouse hematopoietic stem cells is reduced by JAK2V617F without compromising progenitor cell expansion. *PLoS biology* 2013;11:e1001576.
5. de Haan G, Nijhof W, Van Zant G. Mouse strain-dependent changes in frequency and proliferation of hematopoietic stem cells during aging: correlation between lifespan and cycling activity. *Blood* 1997;89:1543-50.
6. Schulte R, Wilson NK, Prick JC, et al. Index sorting resolves heterogeneous murine hematopoietic stem cell populations. *Experimental hematology* 2015.
7. Wilson NK, Kent DG, Buettner F, et al. Combined Single-Cell Functional and Gene Expression Analysis Resolves Heterogeneity within Stem Cell Populations. *Cell stem cell* 2015.
8. Kent DG, Dykstra BJ, Eaves CJ. Isolation and Assessment of Single Long-Term Reconstituting Hematopoietic Stem Cells from Adult Mouse Bone Marrow. *Curr Protoc Stem Cell Biol* 2016;38:2A 4 1-2A 4 24.
9. Dykstra B, Kent D, Bowie M, et al. Long-term propagation of distinct hematopoietic differentiation programs in vivo. *Cell stem cell* 2007;1:218-29.
10. Nice FL, Massie CE, Klampfl T, Green AR. Determination of complex subclonal structures of hematological malignancies by multiplexed genotyping of blood progenitor colonies. *Experimental hematology* 2018;57:60-4 e1.
11. Ortmann CA, Kent DG, Nangalia J, et al. Effect of mutation order on myeloproliferative neoplasms. *The New England journal of medicine* 2015;372:601-12.
12. Pfaffl MW. A new mathematical model for relative quantification in real-time RT-PCR. *Nucleic acids research* 2001;29:e45.

A

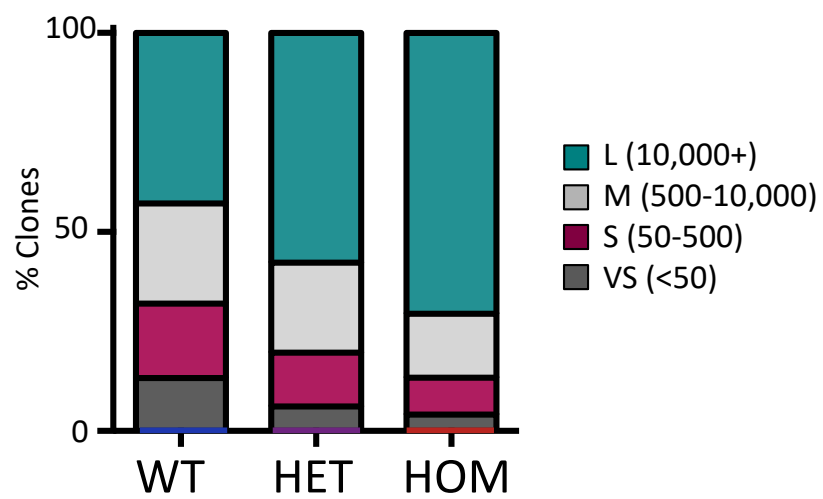

Figure S1



A

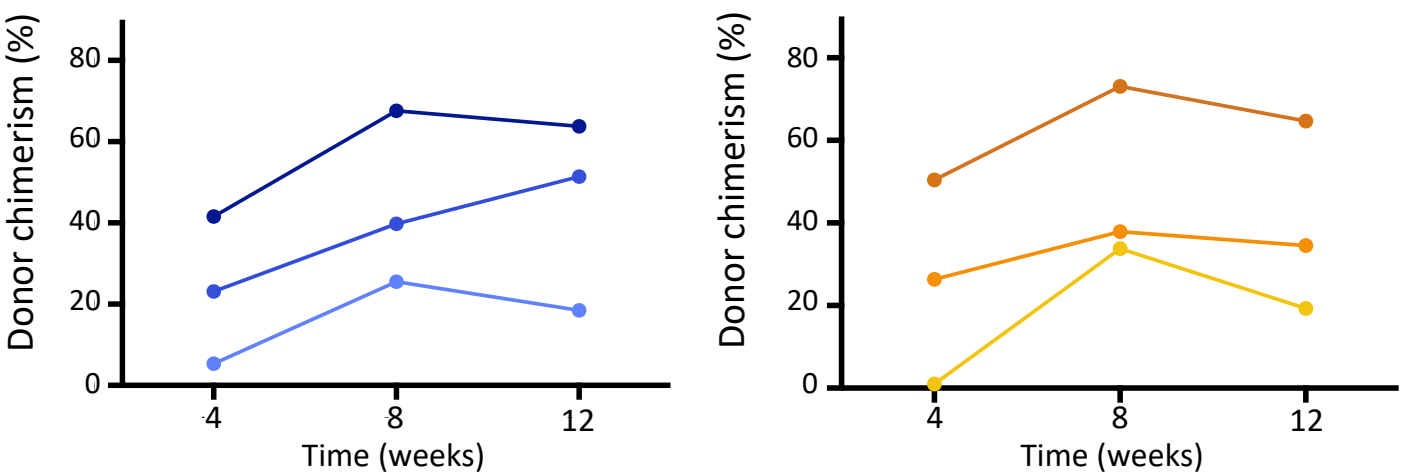

B

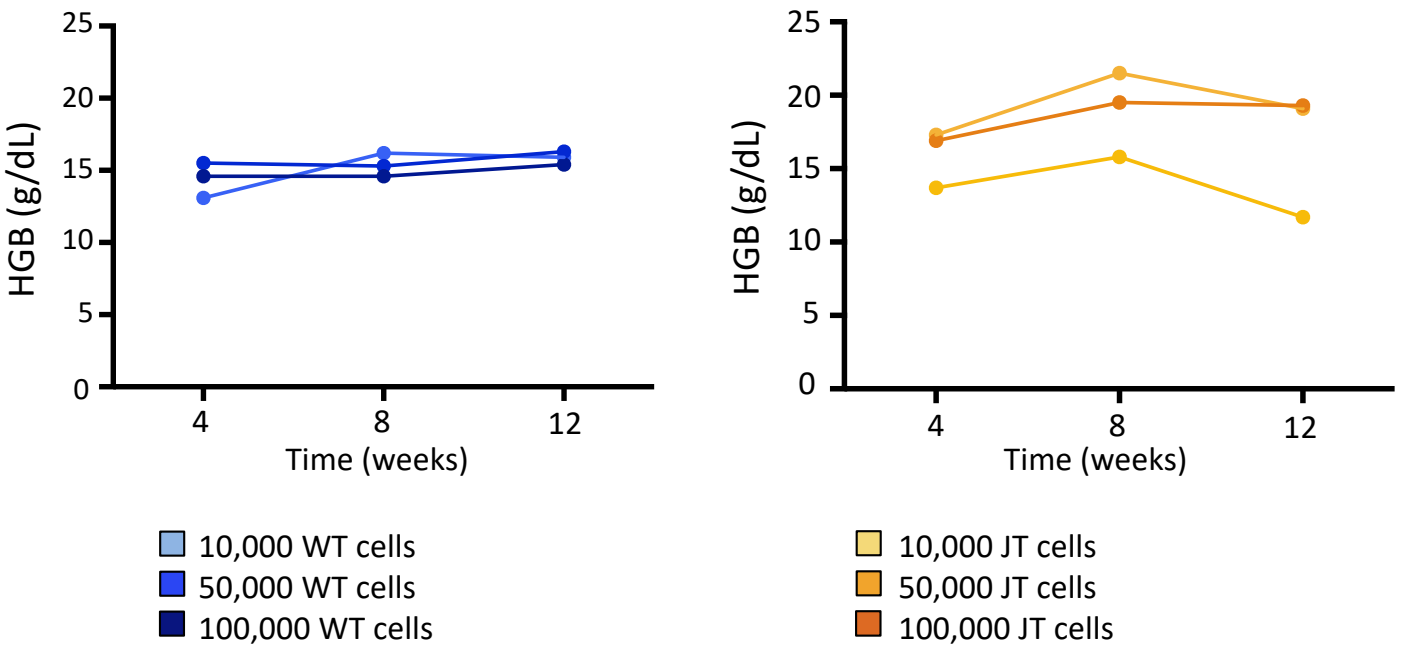

Figure S3

**A**

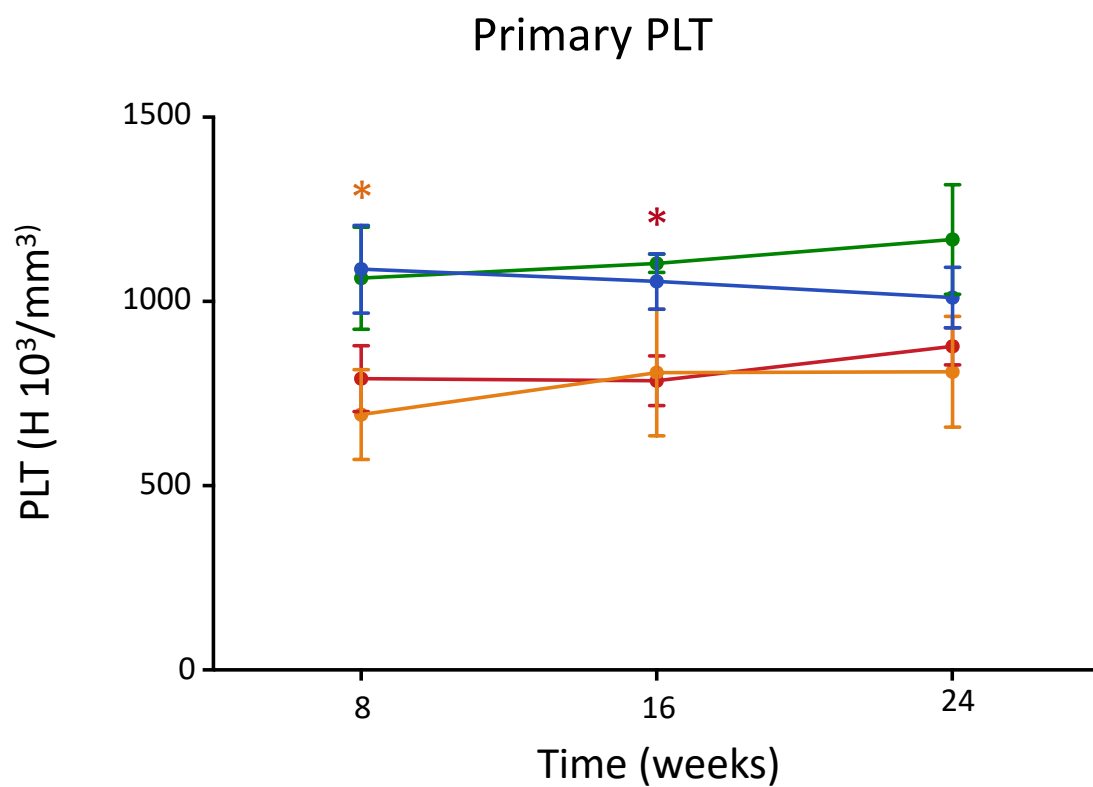

**B**

**Secondary HCT**

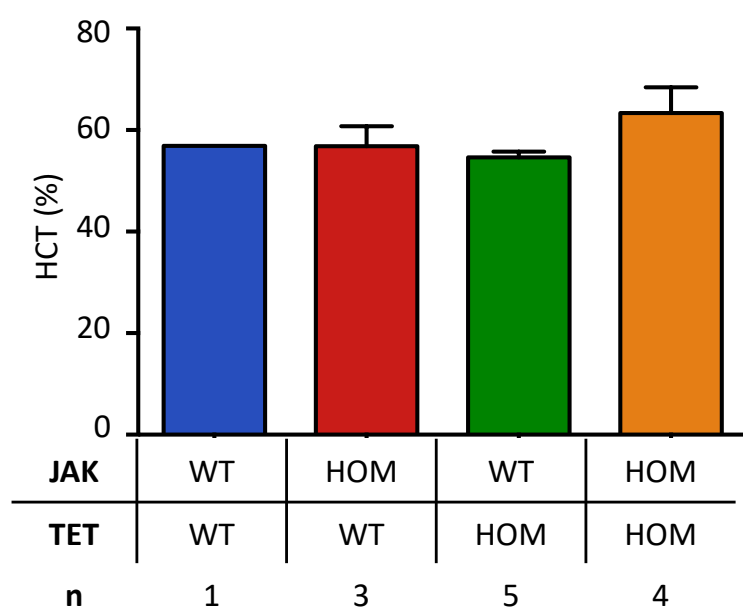

**C**

**Secondary HGB**

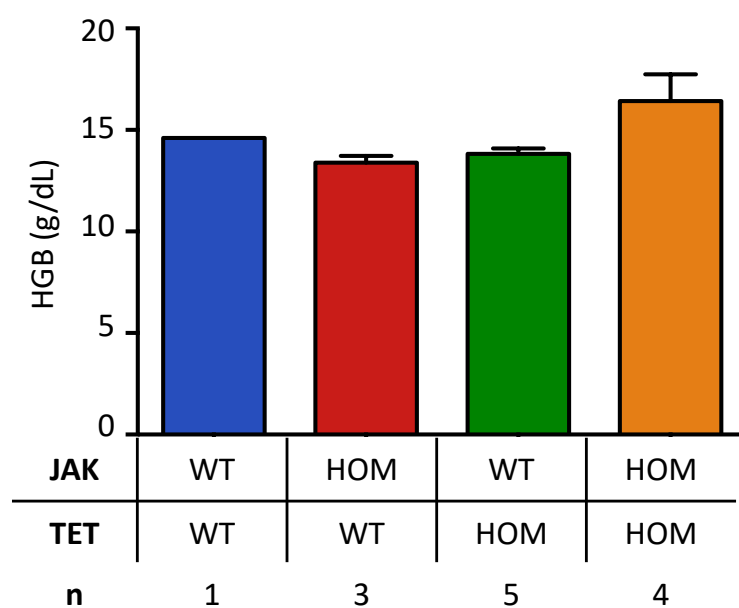

Figure S4

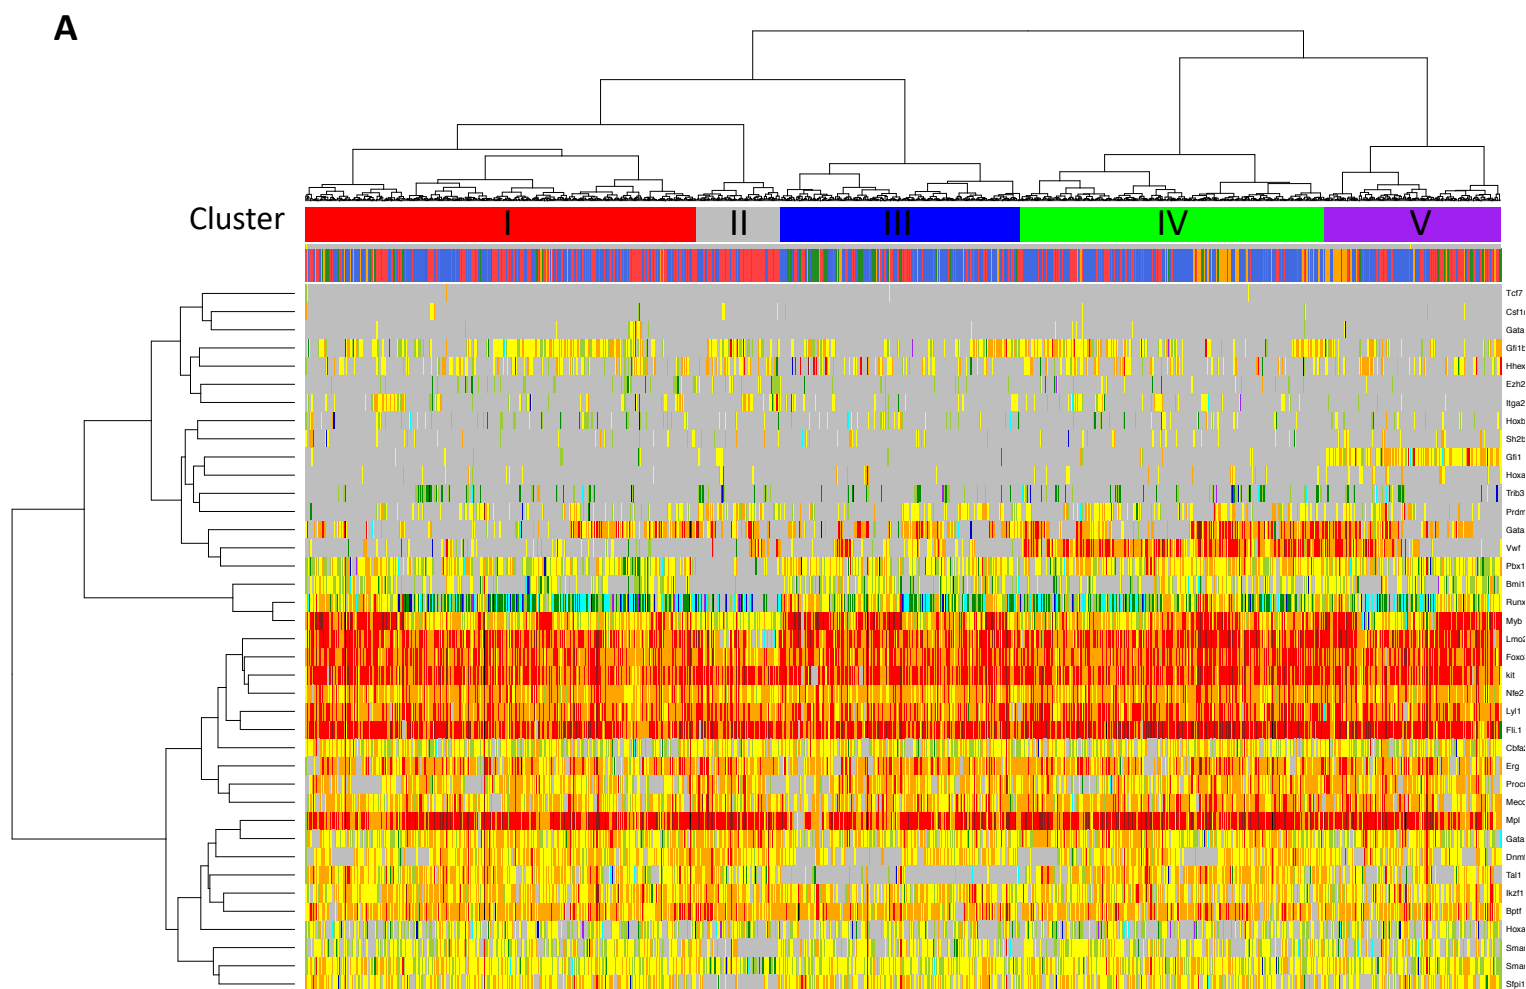

**B**

|         | Cluster I | Cluster II | Cluster III | Cluster IV | Cluster V |
|---------|-----------|------------|-------------|------------|-----------|
| WT      | 0.4804    | 0.1252     | 0.7124      | 0.04       | 0.2938    |
| JAK HOM | 0.0282    | 0.0028     | 0.0333      | 0.0057     | 0.988     |
| TET HOM | 0.4677    | 0.0687     | 0.0005      | 0.0015     | 0.6604    |
| DOUBLE  | 0.0512    | 0.0209     | 0.4562      | 0.0482     | 0.0795    |

Figure S5

**A**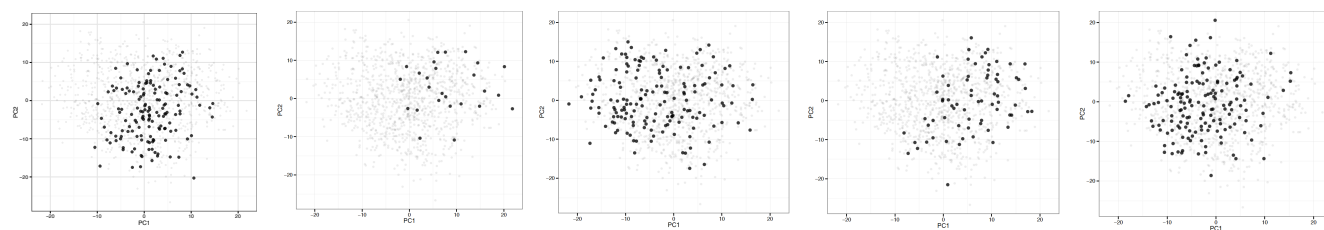**B**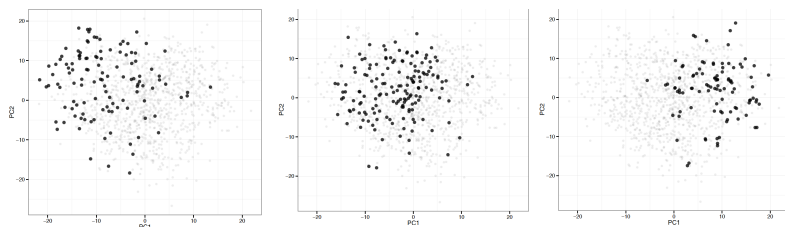**C**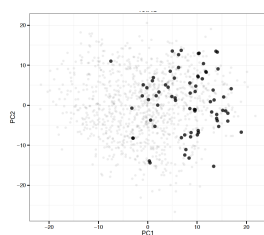**D**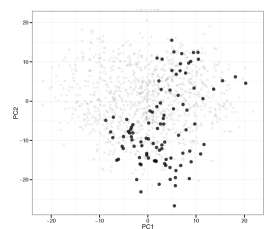

Figure S6

**A**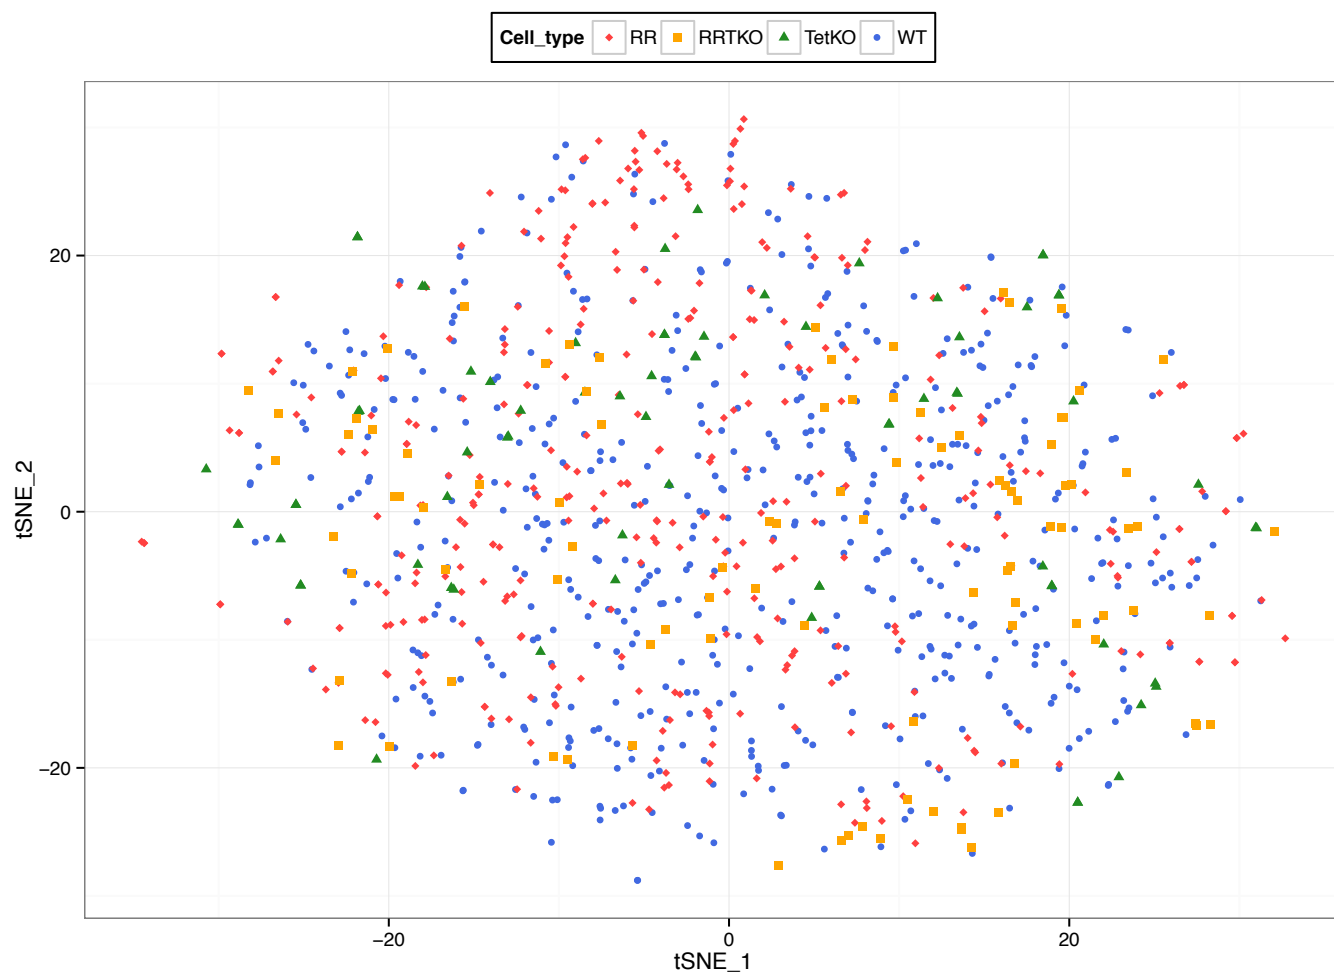**B**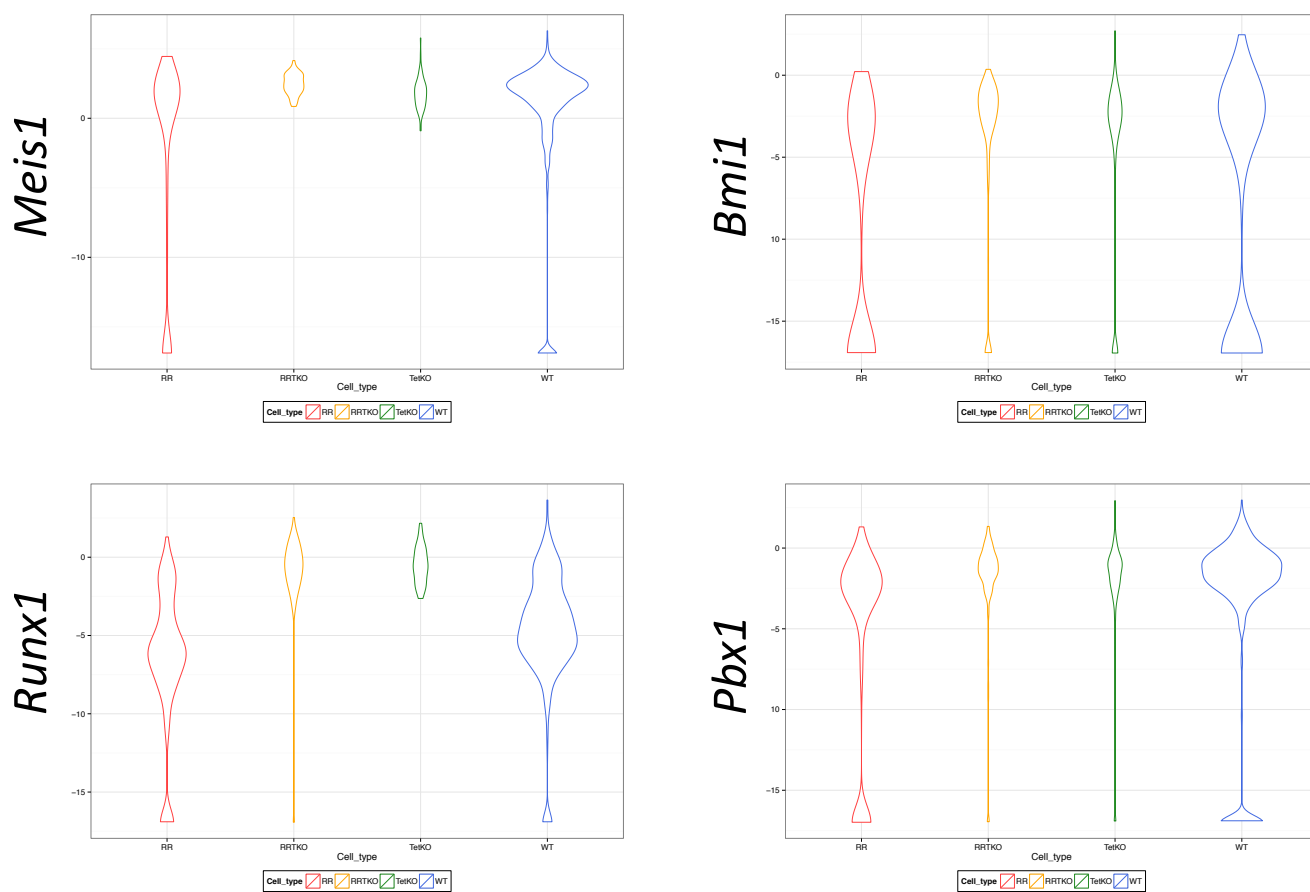**Figure S7**

**A***Bmi1*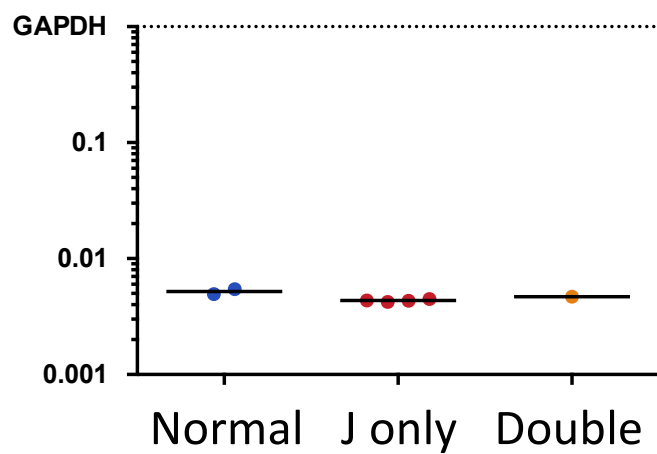**B***Runx1*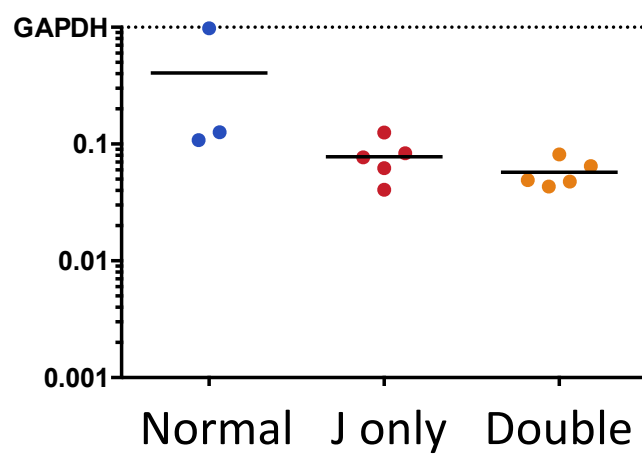**C***Pbx1*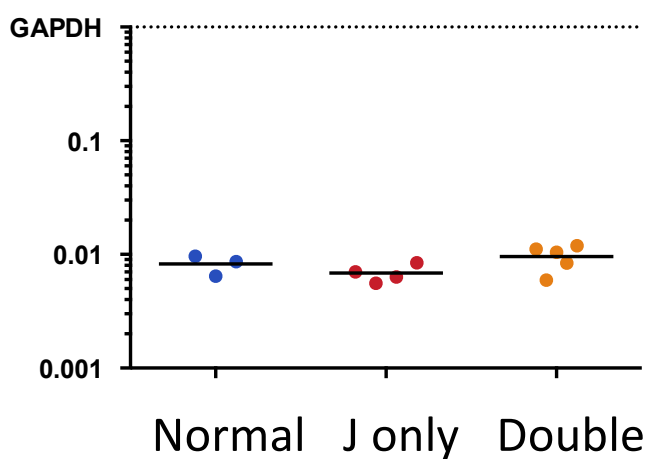**D***Meis1*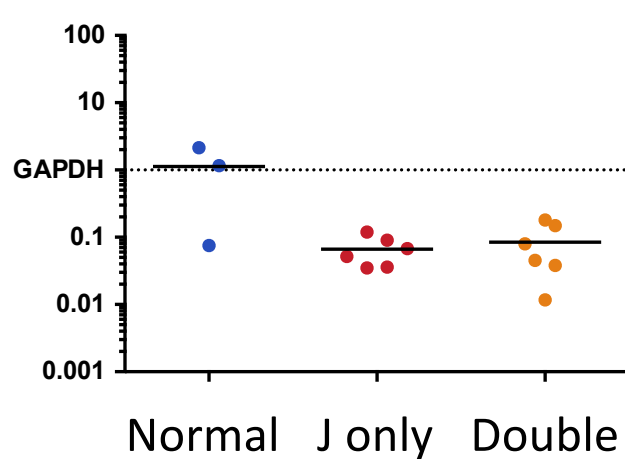

Figure S8

Table S1

| Gene     | TaqMan order ID | Efficiency |
|----------|-----------------|------------|
| Bmi1     | Mm00776122_gH   | 1.87       |
| Bptf     | Mm01251151_m1   | 1.94       |
| Cbfa2t3h | Mm00486780_m1   | 1.97       |
| Cbx7     | Mm00520006_m1   | 1.66       |
| Cdkn2a   | Mm00494449_m1   | 1.80       |
| Csf1r    | Mm01266652_m1   | 1.69       |
| Dnmt3a   | Mm00432881_m1   | 1.97       |
| Egfl7    | Mm00618004_m1   | 1.52       |
| Eif2b1   | Mm01199614_m1   | 1.95       |
| Erg      | Mm01214246_m1   | 1.96       |
| Ezh2     | Mm00468464_m1   | 1.52       |
| Fli-1    | Mm00484409_m1   | 1.94       |
| Foxo3a   | Mm01185722_m1   | 1.79       |
| Gata1    | Mm00484678_m1   | 1.94       |
| Gata2    | Mm00492300_m1   | 1.95       |
| Gata3    | Mm00484683_m1   | 2.03       |
| Gfi1     | Mm00515855_m1   | 2.02       |
| Gfi1b    | Mm00492318_m1   | 1.91       |
| Hhex     | Mm00433954_m1   | 1.98       |
| Hoxa5    | Mm00439362_m1   | 1.98       |
| Hoxa9    | Mm00439364_m1   | 2.02       |
| Hoxb4    | Mm00657964_m1   | 1.89       |
| Ikzf1    | Mm01187882_m1   | 1.94       |
| Itga2b   | Mm00439768_m1   | 1.68       |
| kit      | Mm00445212_m1   | 1.79       |
| Lmo2     | Mm01281680_m1   | 1.89       |
| Lyl1     | Mm01247198_m1   | 1.99       |
| Mecom    | Mm01289155_m1   | 2.02       |
| Meis1    | Mm00487659_m1   | 1.95       |
| Mitf     | Mm01182480_m1   | 2.04       |
| Mpl      | Mm00440310_m1   | 1.96       |
| Myb      | Mm00501741_m1   | 1.95       |
| Nfe2     | Mm00801891_m1   | 1.97       |
| Pbx1     | Mm04207617_m1   | 1.90       |
| Polr2a   | Mm00839493_m1   | 1.90       |
| Prdm16   | Mm00712556_m1   | 2.02       |
| Procr    | Mm00440993_mH   | 2.06       |
| Runx1    | Mm01213405_m1   | 1.96       |
| Sfpi1    | Mm00488142_m1   | 1.92       |
| Sh2b3    | Mm00493156_m1   | 1.99       |
| Smarcc1  | Mm00486224_m1   | 2.00       |
| Smarcc2  | Mm01159912_m1   | 1.78       |
| Tal1     | Mm01187033_m1   | 1.98       |
| Tcf7     | Mm00493445_m1   | 2.16       |
| Tet2     | Mm00524395_m1   | 1.93       |
| Trib3    | Mm00454879_m1   | 1.73       |
| UBC      | Mm01201237_m1   | 1.94       |
| Vwf      | Mm00550376_m1   | 2.02       |

Table S2

| Gene  | TaqMan order ID |
|-------|-----------------|
| Meis1 | Hs00180020_m1   |
| Bmi1  | Hs00180411_m1   |
| Runx1 | Hs02558380_s1   |
| Pbx1  | Hs00231228_m1   |
| GAPDH | Hs02786624_g1   |
